# Supplementary material
Source: publisher figshare collection journal article supplement (https://sage.figshare.com/ndownloader/files/28339223)

## Supplemental Material

### **Supplemental Figure Legends**

**Supplemental Figure 1.** a) Baseline electrocardiogram showing delta wave due to pre-excitation from accessory pathway; b) Tachyarrhythmia electrocardiogram showing pre-excited atrial fibrillation.

**Supplemental Figure 2.** Premature ventricular contractions in a bigeminal pattern.

**Supplemental Figure 3.** Monomorphic non-sustained ventricular tachycardia.

**Supplemental Figure 4.** Polymorphic non-sustained ventricular tachycardia.

**Supplemental Figure 5.** Accelerated idioventricular rhythm.

**Supplemental Figure 6.** a) Baseline electrocardiogram with atrial fibrillation; b) tachyarrhythmia electrocardiogram with monomorphic ventricular tachycardia with axis shift; c) monomorphic ventricular tachycardia with extreme axis deviation, positive aVR, precordial concordance, QRS width > 160 ms, and Josephson's sign; d) monomorphic ventricular tachycardia with positive aVR, QRS width > 200 ms, and Brugada's sign; e) monomorphic ventricular tachycardia with atrioventricular dissociation, a fusion beat, and a capture beat. Figures c, d, and e adapted from open access figures from Life in the Fast Lane, <https://litfl.com/ventricular-tachycardia-monomorphic-ecg-library/> (CC BY-NC-SA 4.0 license)

**Supplemental Figure 7.** a) Baseline atrial sensed, ventricular paced electrocardiogram with prolonged QT > 600 milliseconds; b) tachyarrhythmia electrocardiogram with torsades-de-pointes (polymorphic ventricular tachycardia). Typical short-long-short RR intervals inciting torsades-de-pointes.

**Supplemental Figure 8.** Ventricular flutter. From open access figure from Life in the Fast Lane, <https://litfl.com/ventricular-flutter-ecg-library/> (CC BY-NC-SA 4.0 licence)

**Supplemental Figure 9.** Ventricular fibrillation.

**Supplemental Figure 10.** Three examples of artifact on telemetry.

**Supplemental Figure 11.** Periods of asystole on a Holter monitor.

**Supplemental Figure 12.** Patient with episodes on same day of a) orthodromic atrioventricular re-entrant tachycardia; and b) antidromic atrioventricular re-entrant tachycardia

**Supplemental Figure 13.** a) Baseline electrocardiogram with sinus rhythm with pre-existing left bundle branch block. b) Tachyarrhythmia electrocardiogram with atrial fibrillation with rapid ventricular response with left bundle branch block.

**Supplemental Figure 14.** a) Baseline electrocardiogram (after adenosine given) shows narrow QRS complexes. b) Tachyarrhythmia electrocardiogram shows supraventricular tachycardia with aberrancy.

**Supplemental Figure 15.** Wide complex paced rhythm with initial atrial and ventricular pacing followed by pacemaker mediated tachycardia.

**Supplemental Figure 16.** Hyperkalemia electrocardiogram with p-wave flattening and QRS widening with bizarre QRS morphology. Potassium level 8 mEq/L.

**Supplemental Figure 17.** QRS widening and positive R' wave in aVR from tricyclic antidepressant overdose. From open access figure from Life in the Fast Lane, <https://litfl.com/tricyclic-overdose-sodium-channel-blocker-toxicity/> (CC BY-NC-SA 4.0 licence)

**Supplemental Figure 18.** Digoxin toxicity with bidirectional ventricular tachycardia.

**Supplemental Figure 1.**

**a)**

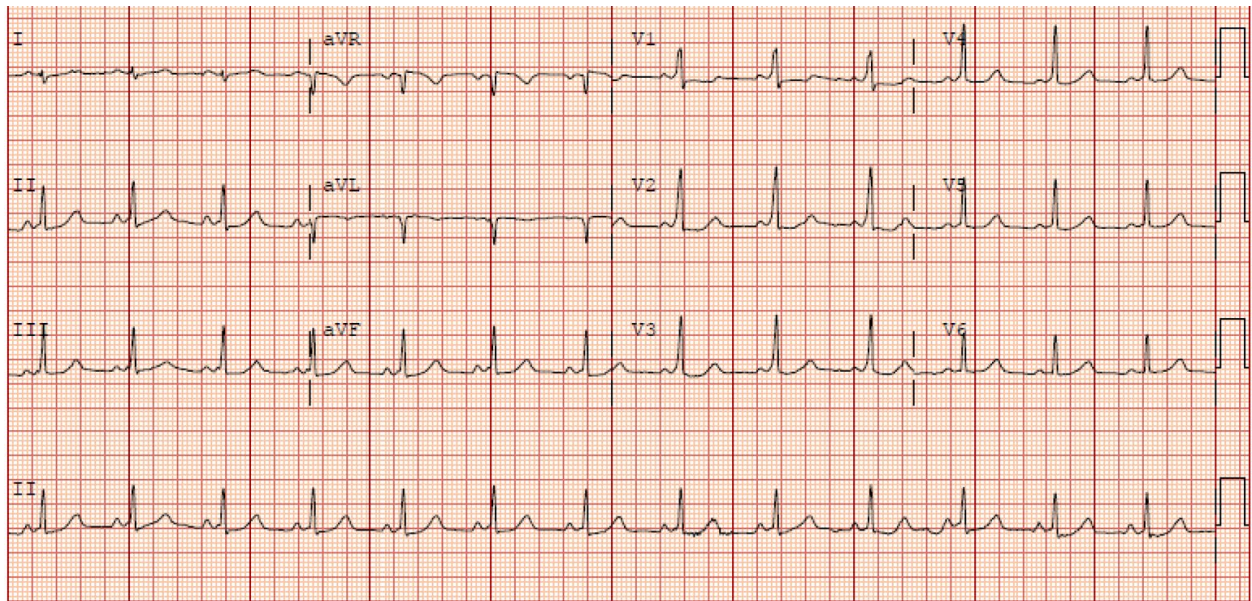

**b)**

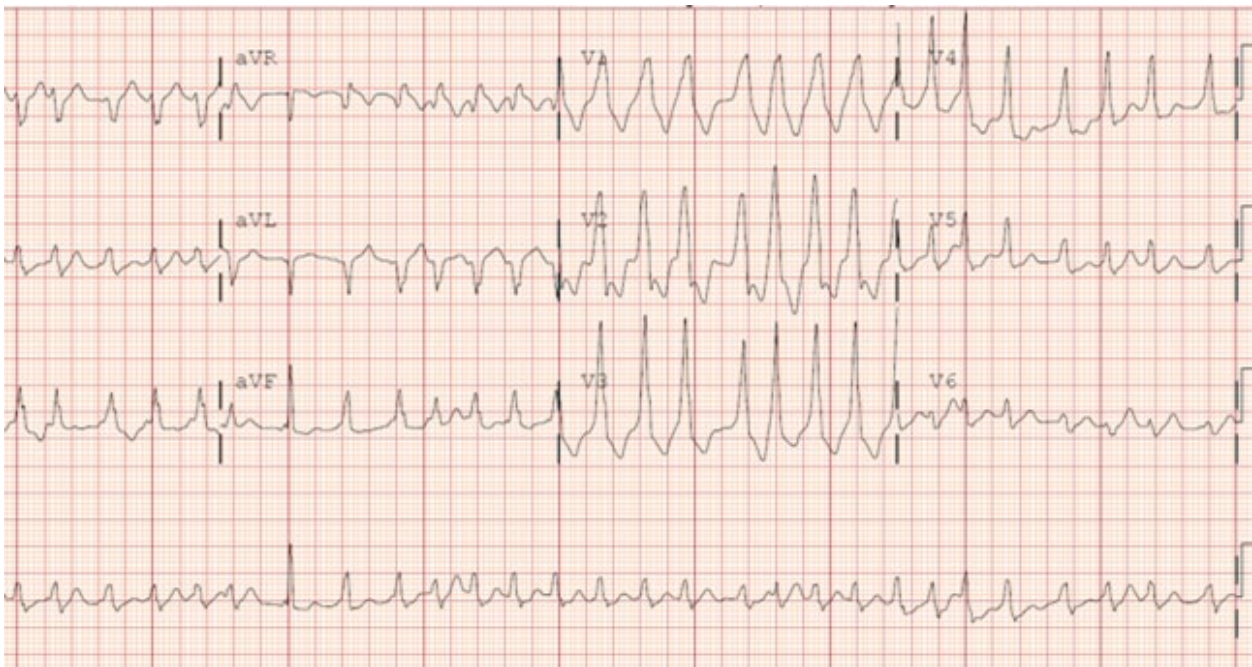



**Supplemental Figure 2.**

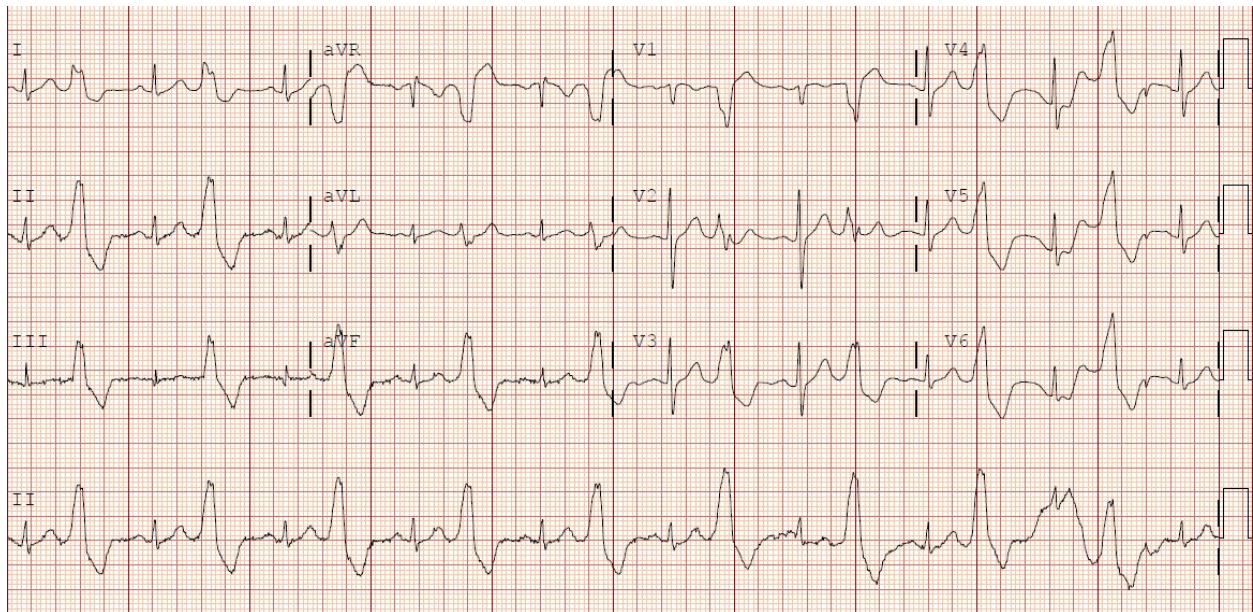

**Supplemental Figure 3.**

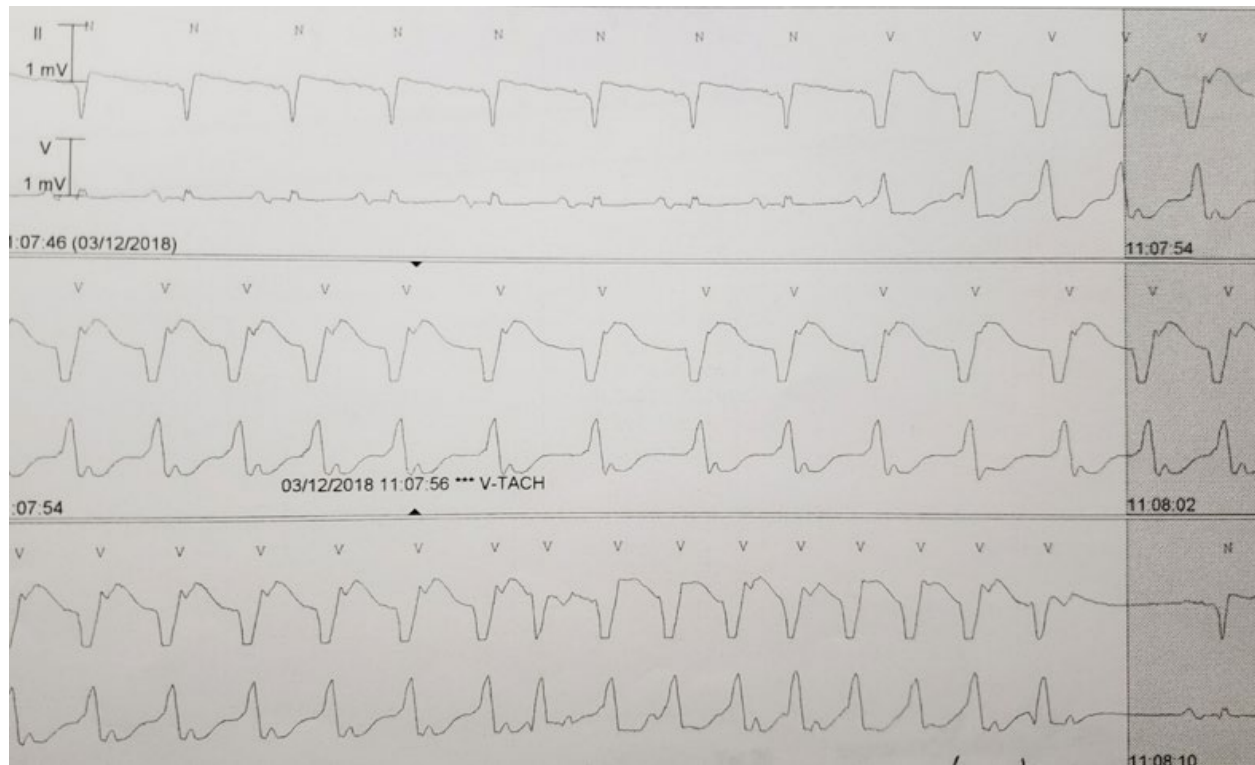

**Supplemental Figure 4.**

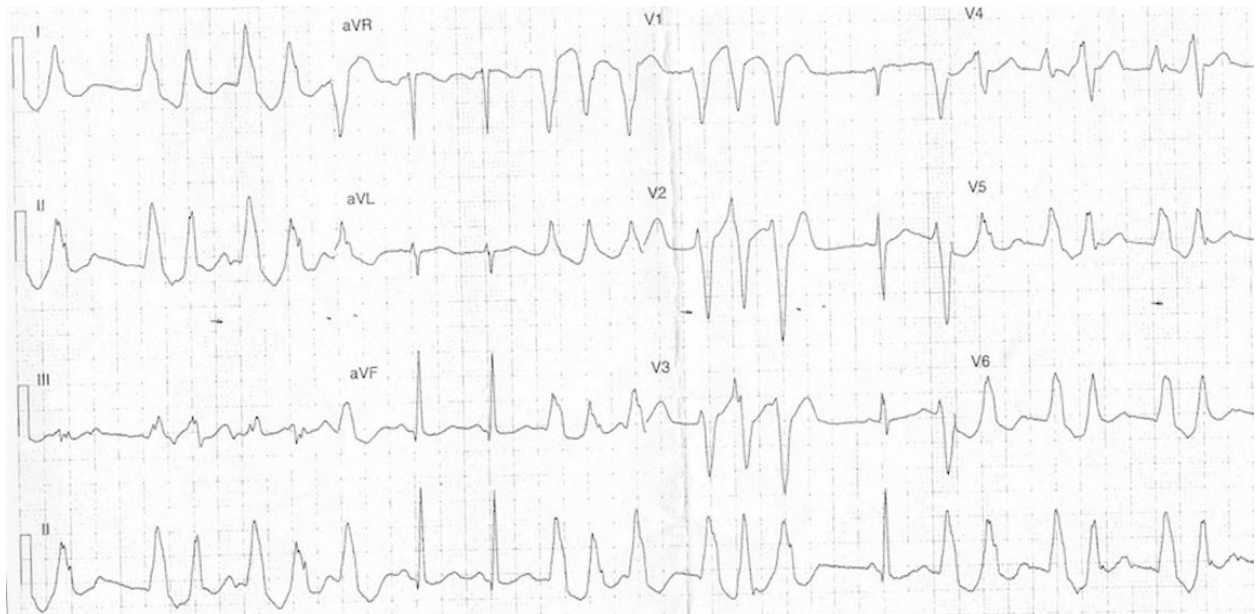

**Supplemental Figure 5.**

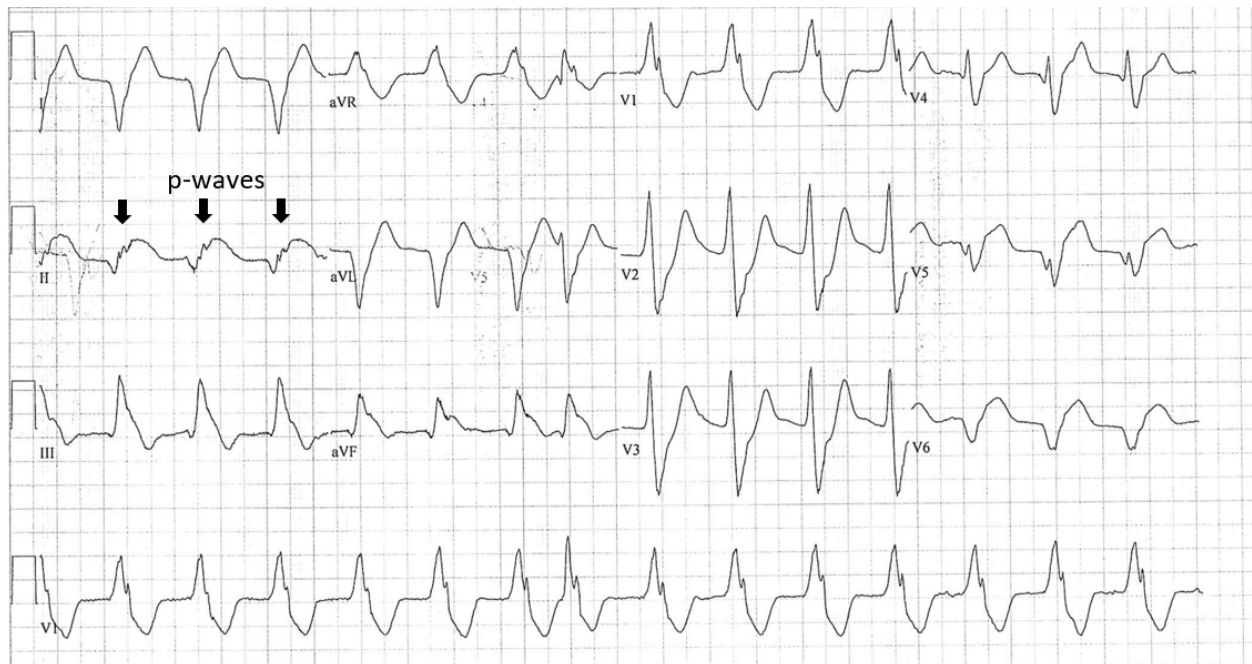



**Supplemental Figure 6.**

**a)**

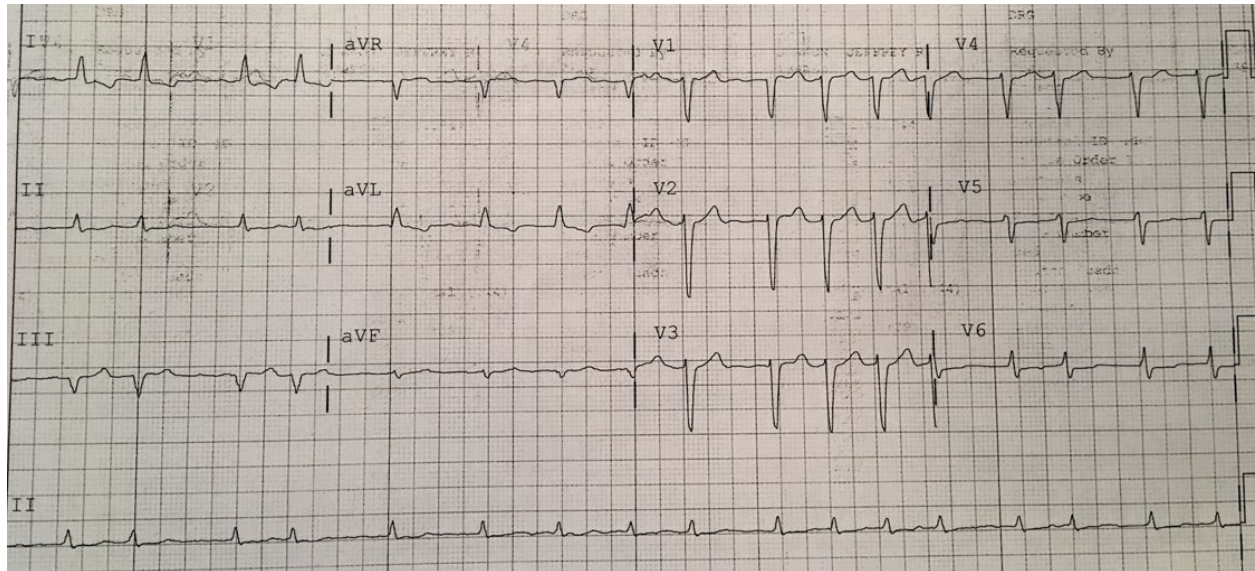

**b)**

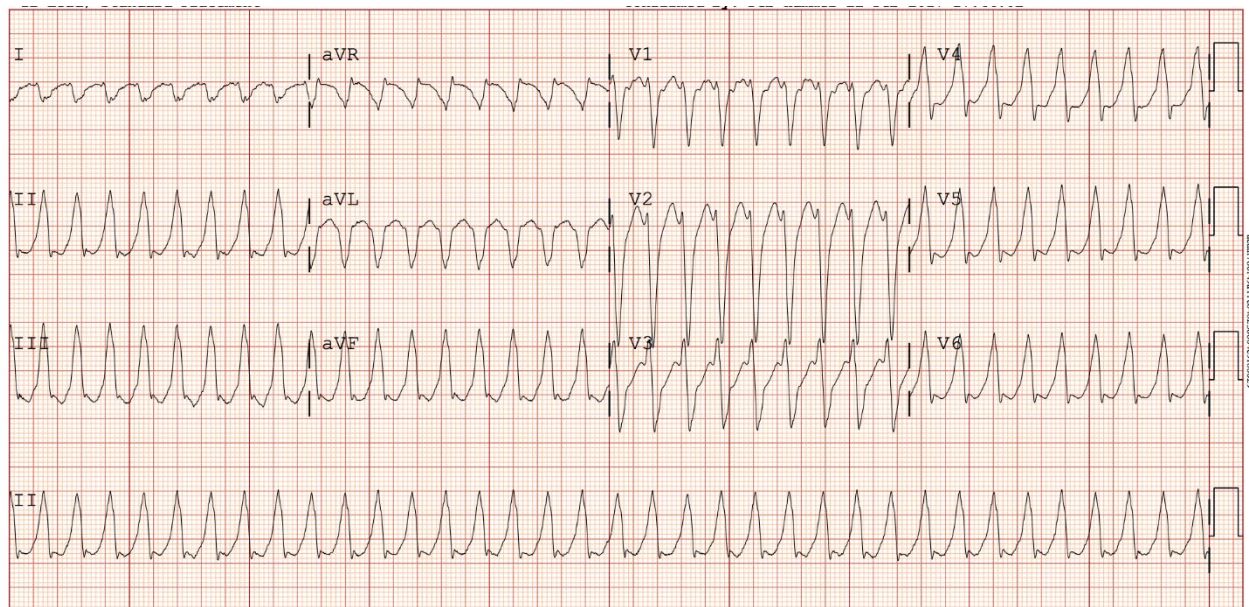



c)

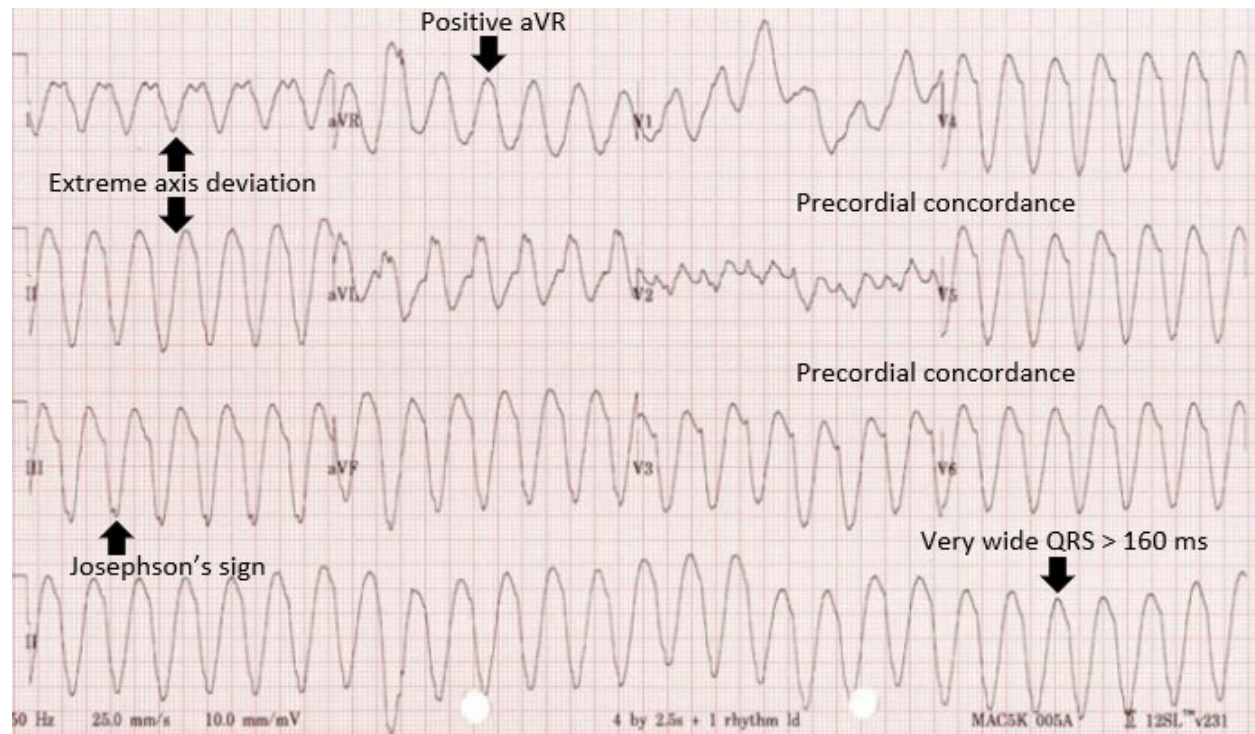

d)

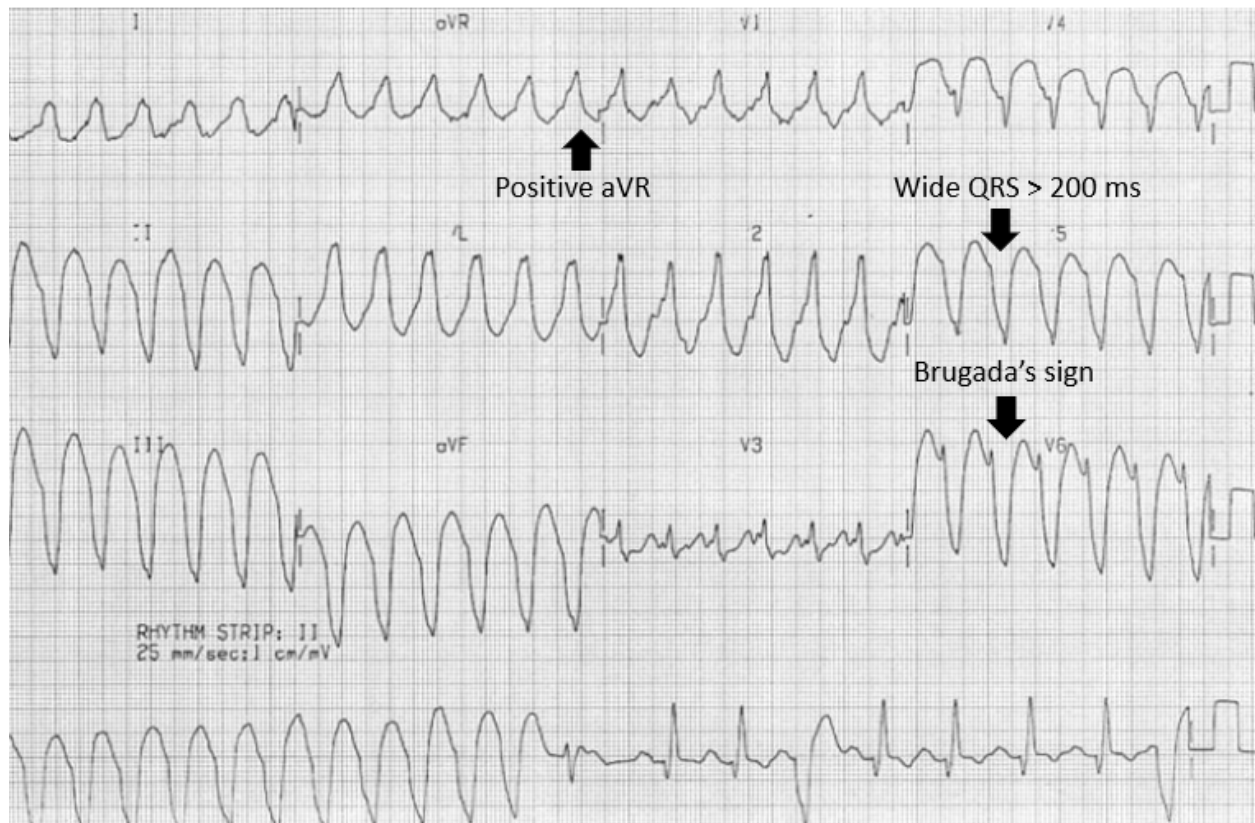

e)

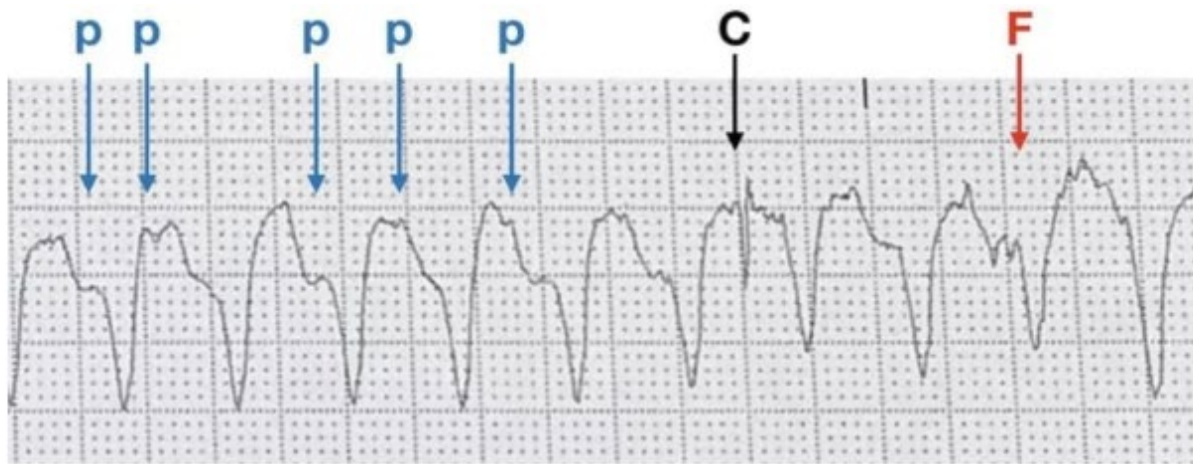

p p waves in AV dissociation

C Capture beat

F Fusion beat



**Supplemental Figure 7.**

**a)**

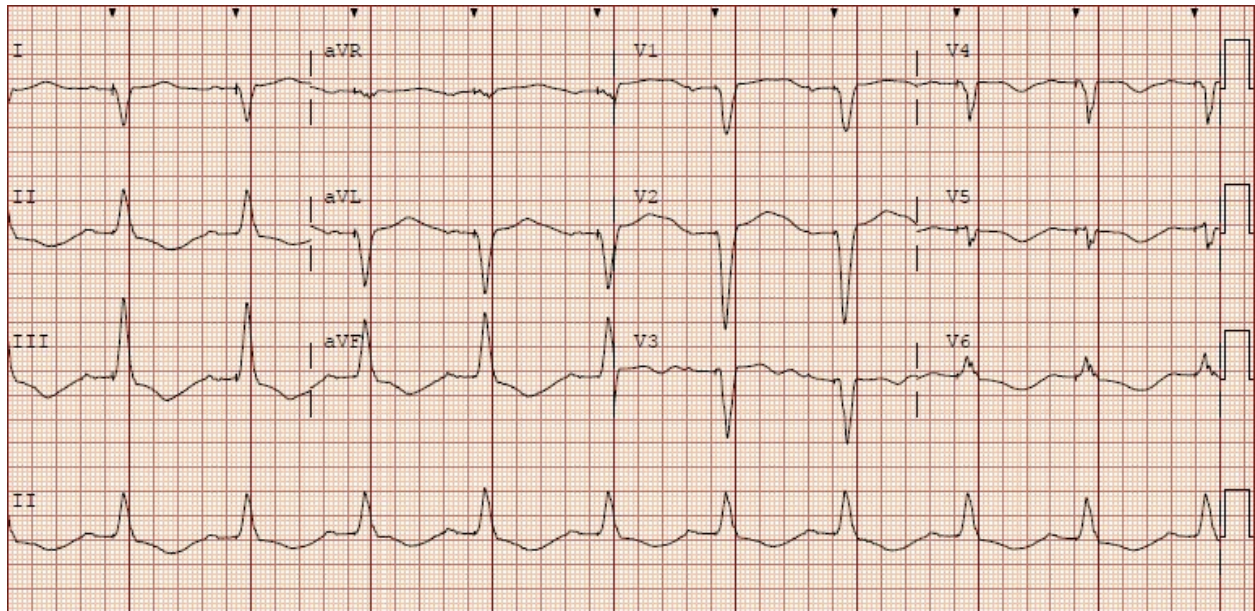

**b)**

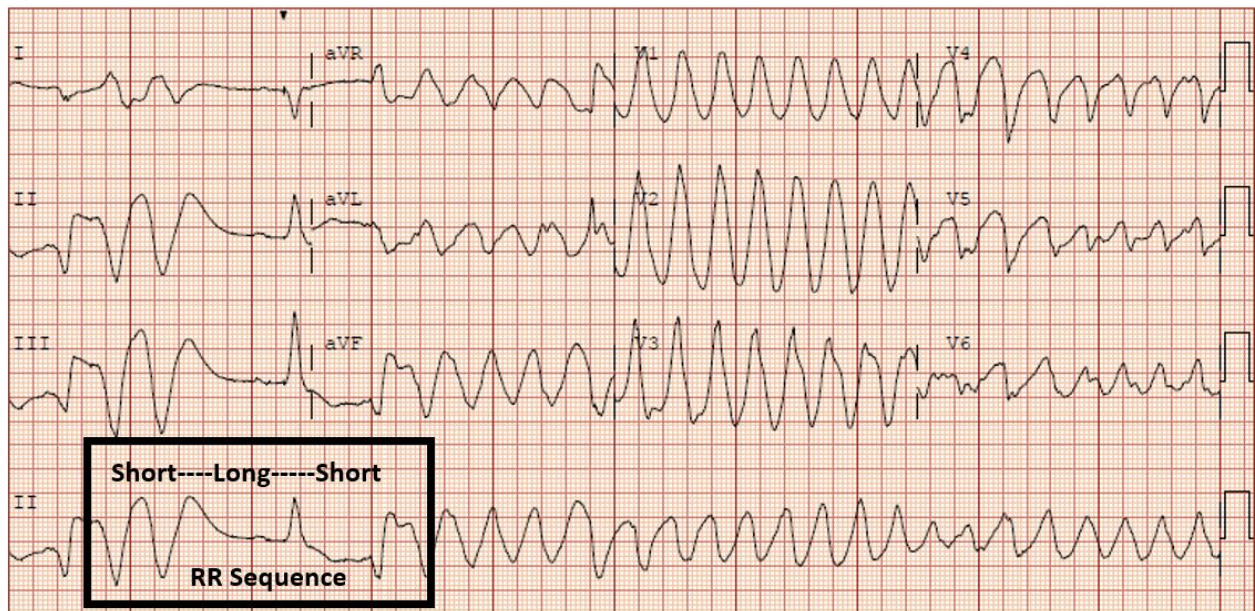



**Supplemental Figure 8.**

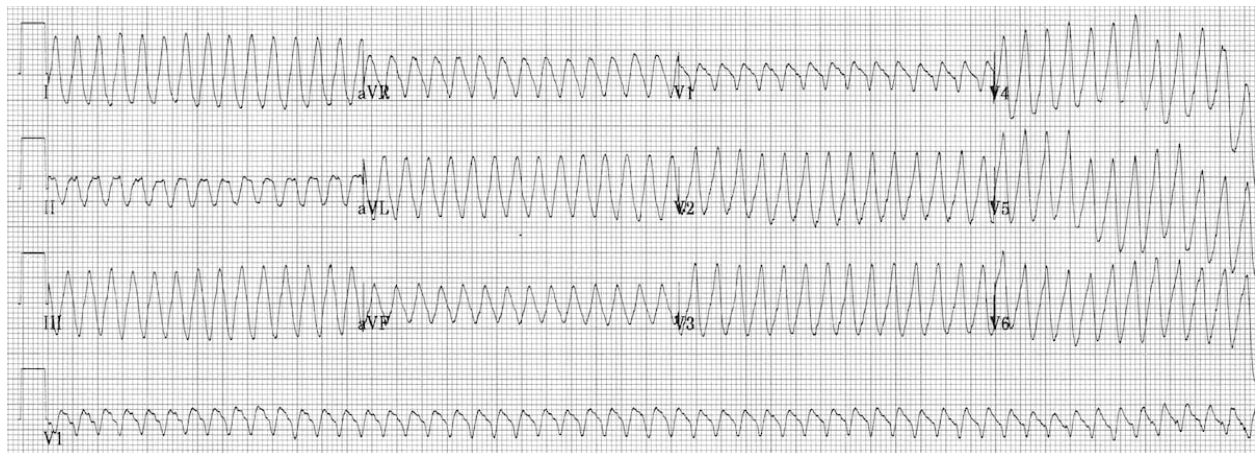

**Supplemental Figure 9.**

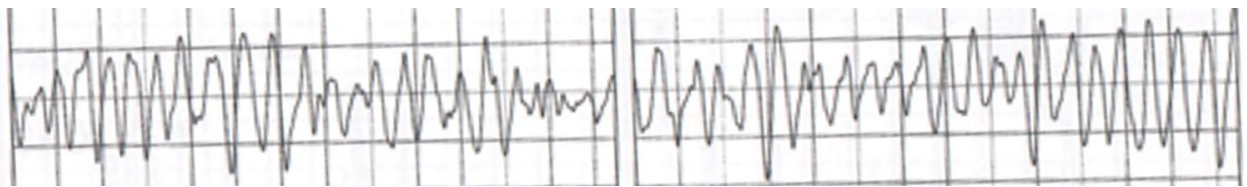

Supplemental Figure 10.

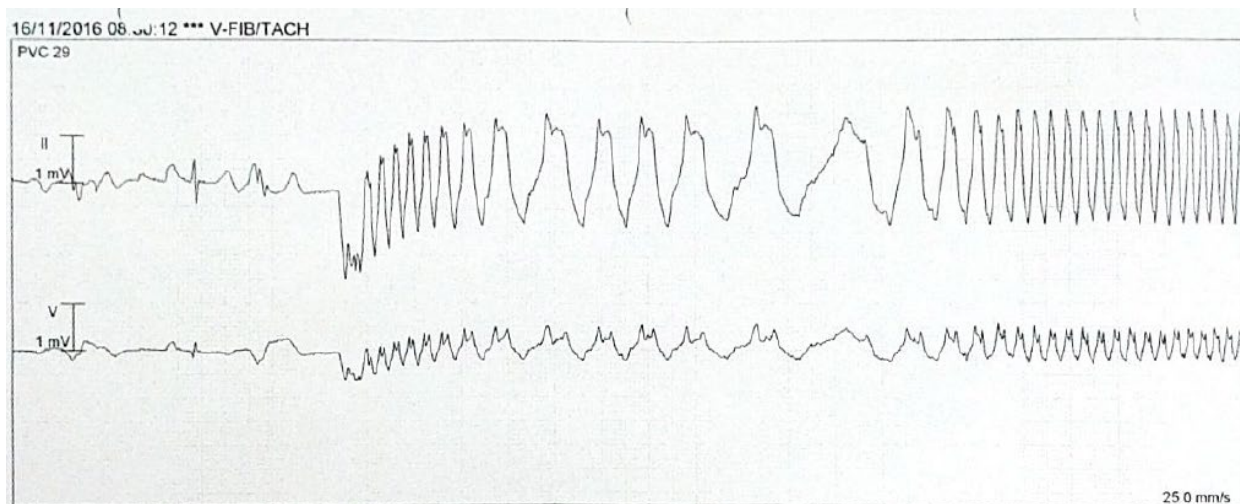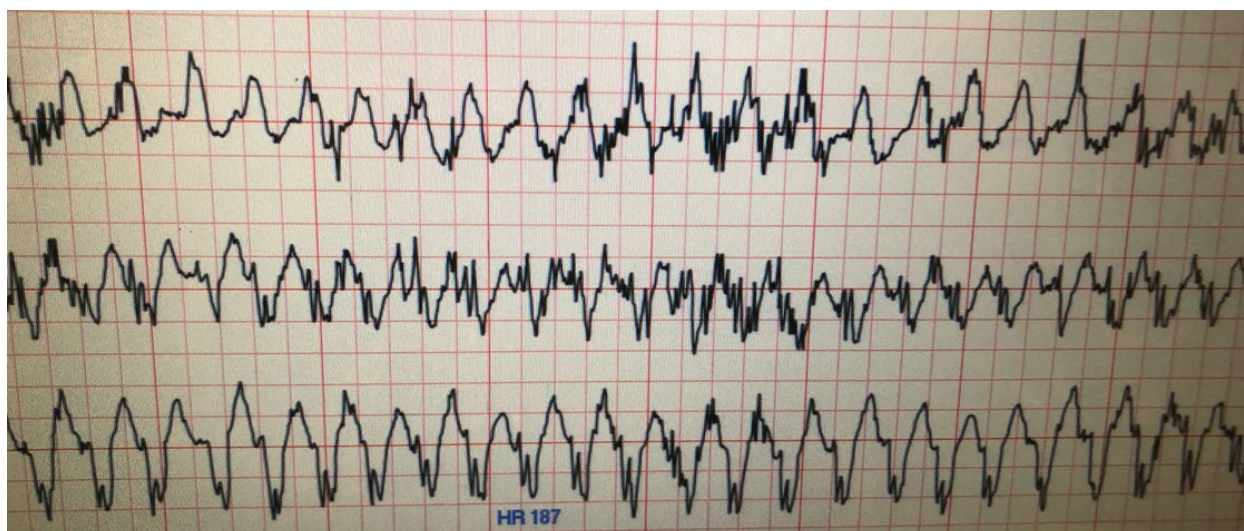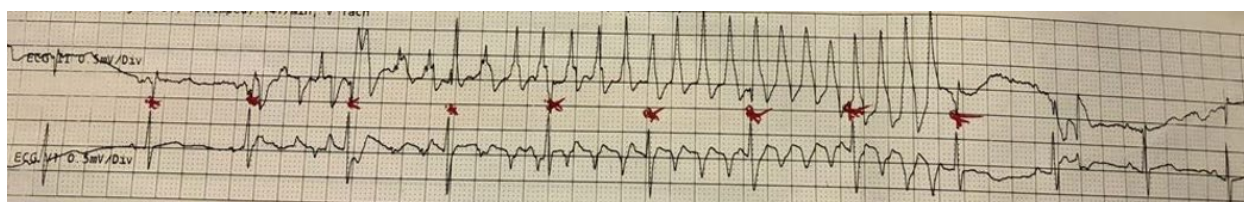



**Supplemental Figure 11.**

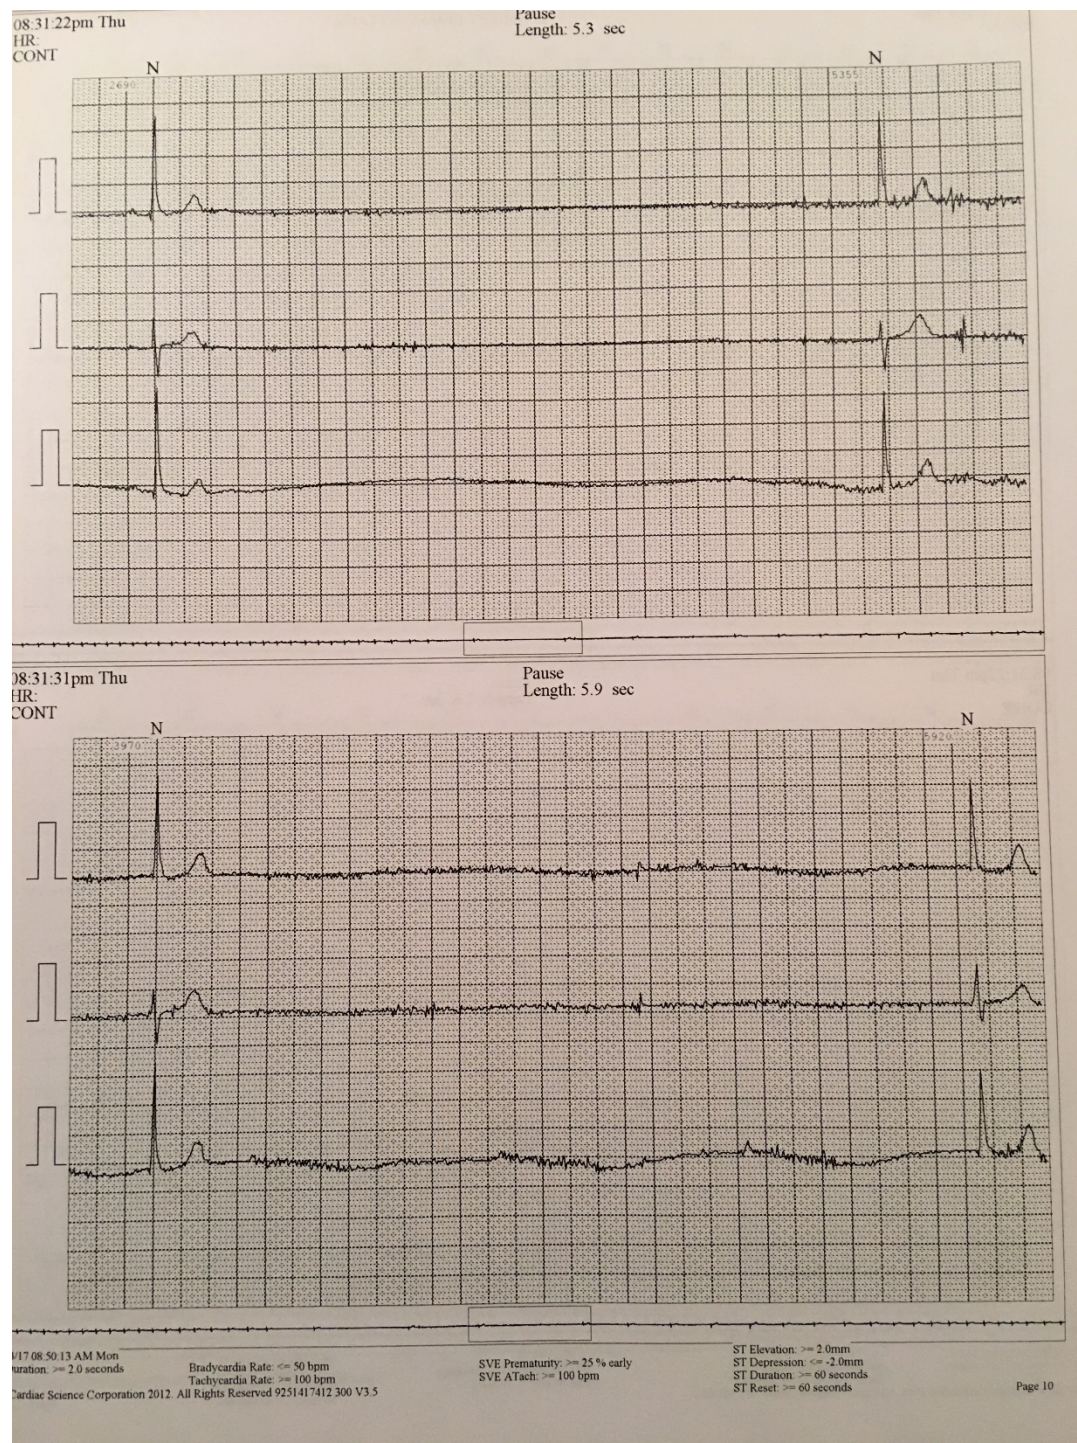



**Supplemental Figure 12**

**a)**

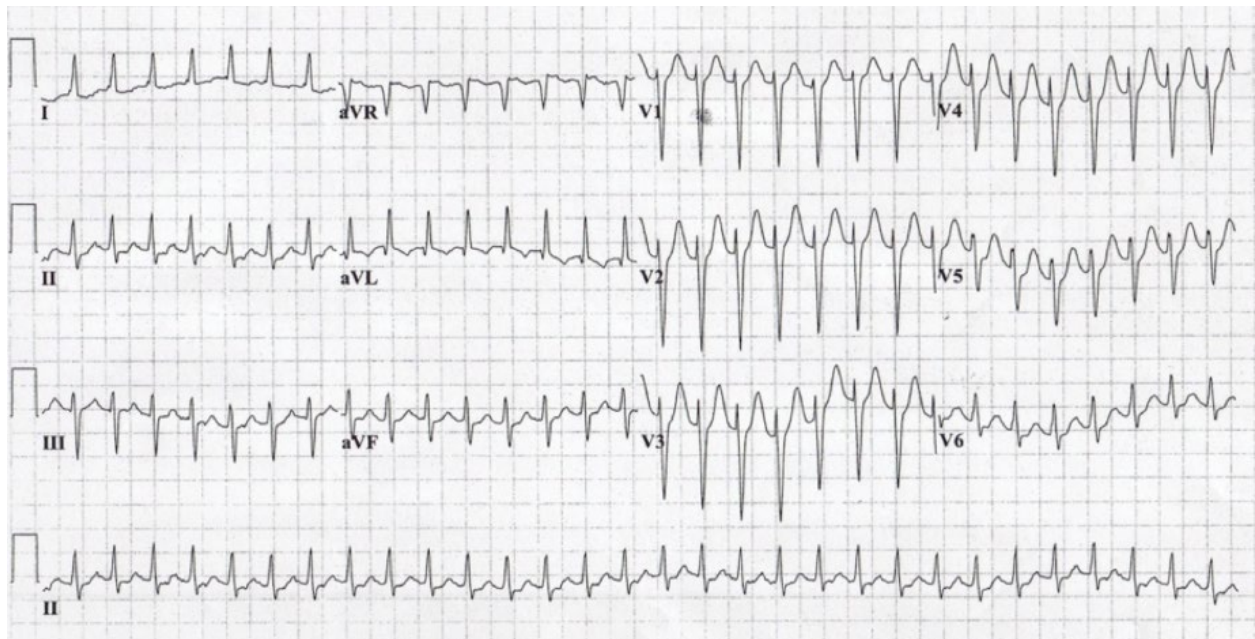

**b)**

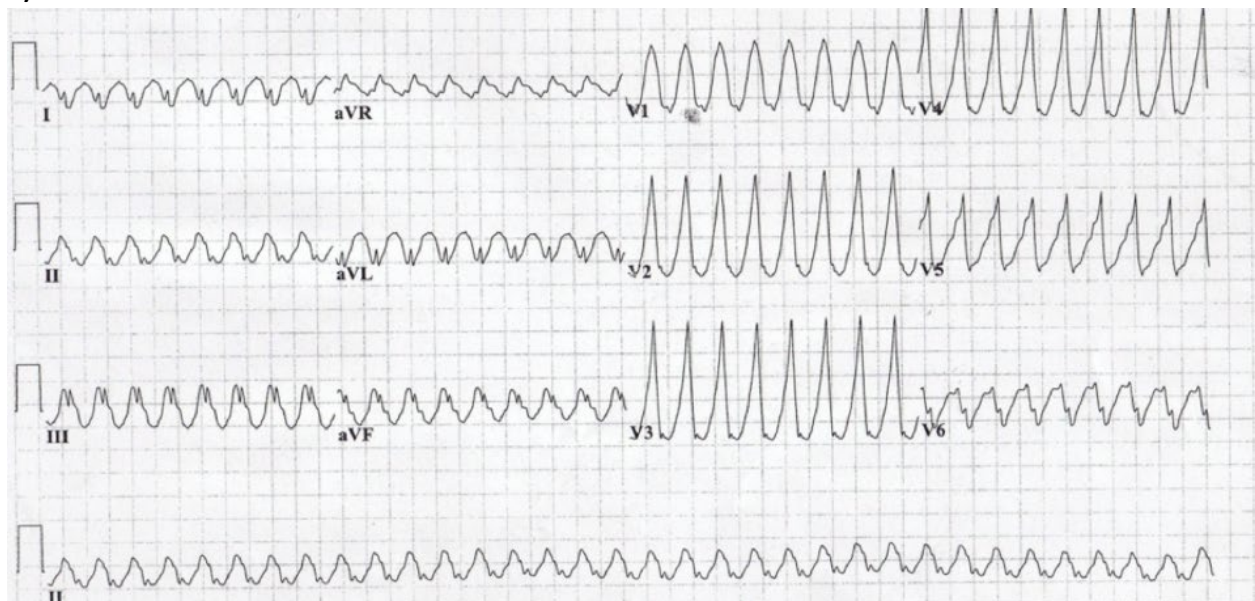

**Supplemental Figure 13.**

**a)**

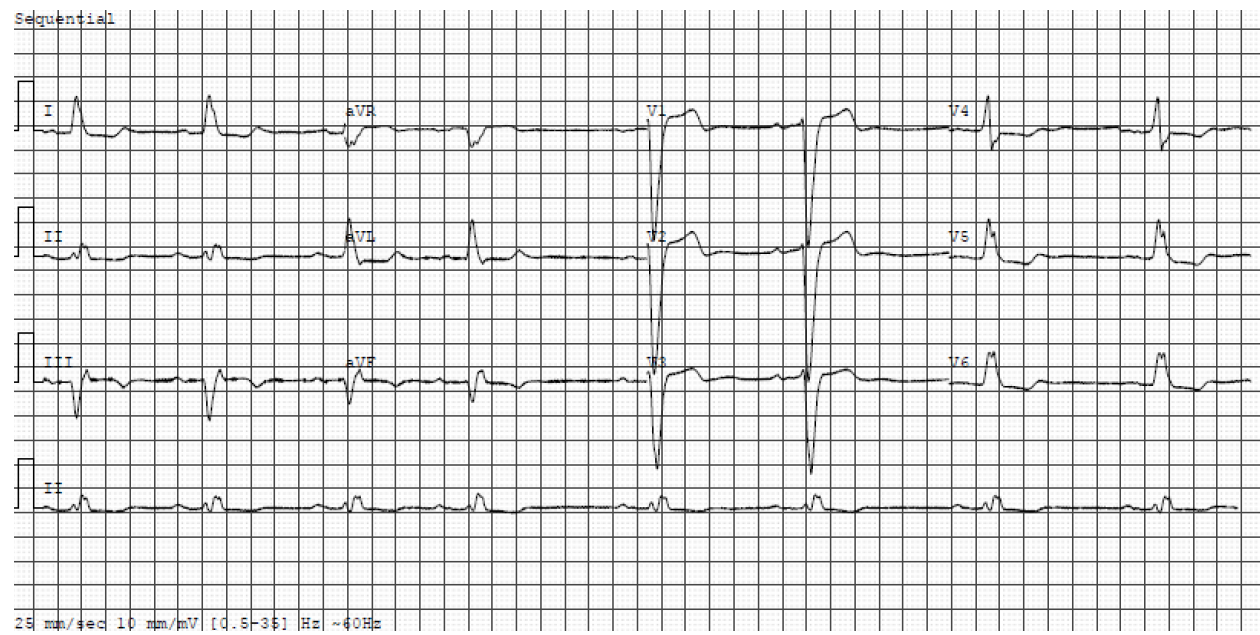

**b)**

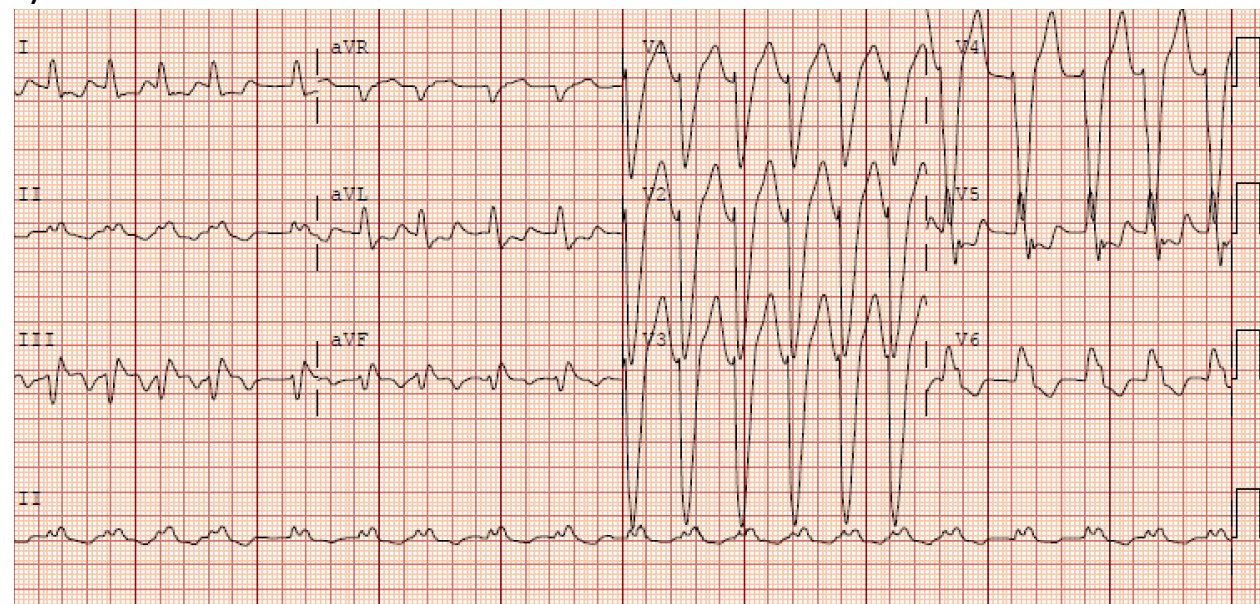

Supplemental Figure 14.

a)

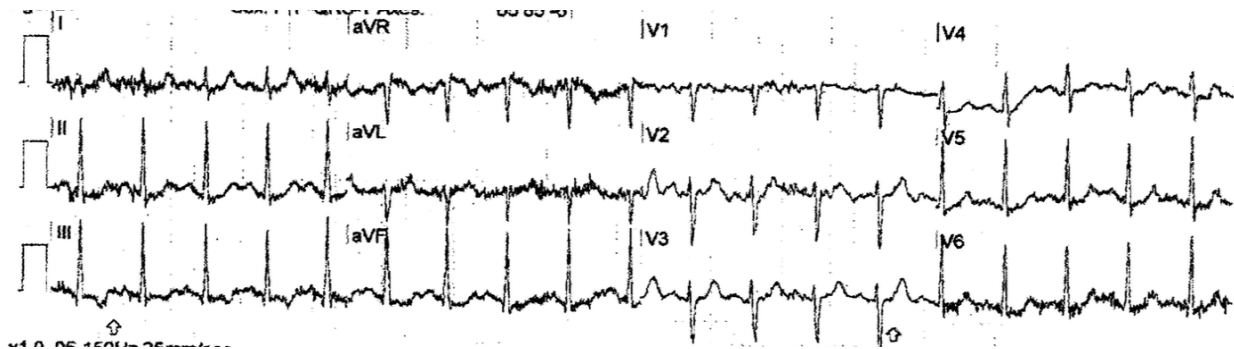

b)

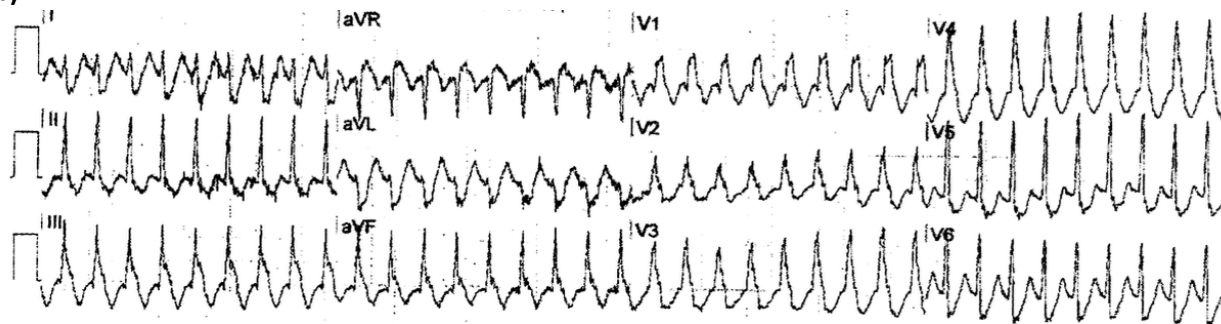

**Supplemental Figure 15.**

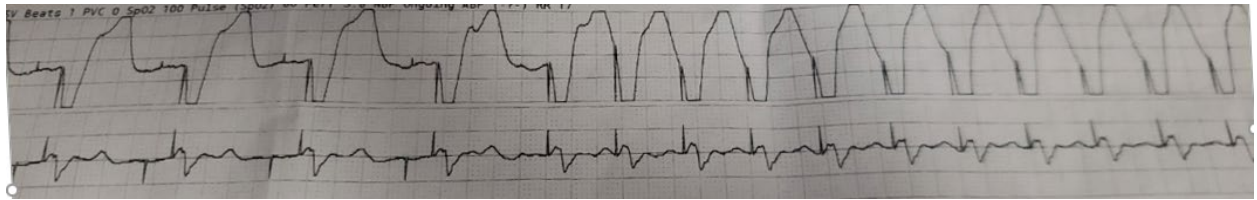



**Supplemental Figure 16.**

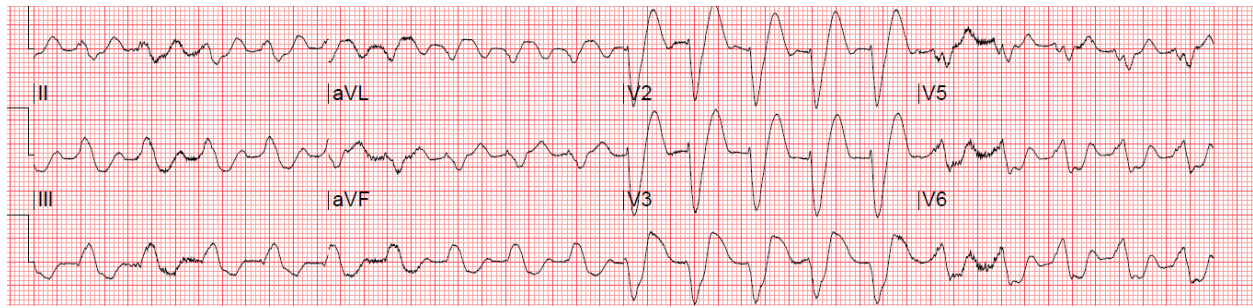

**Supplemental Figure 17.**

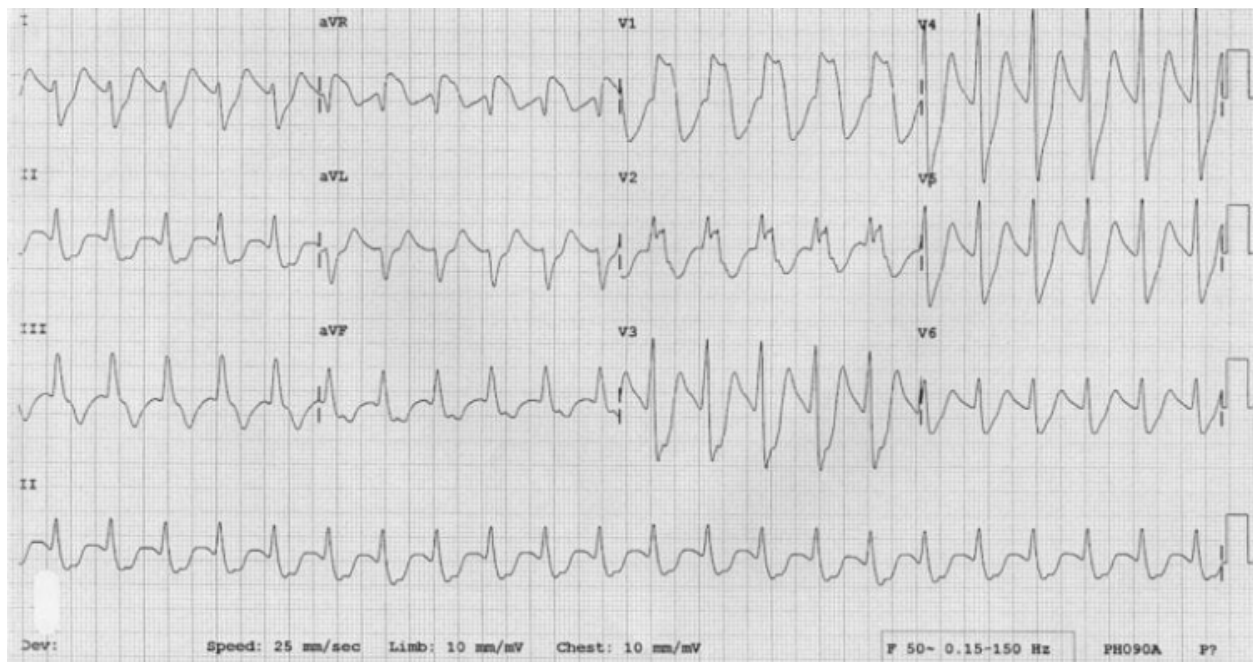

**Supplemental Figure 18**

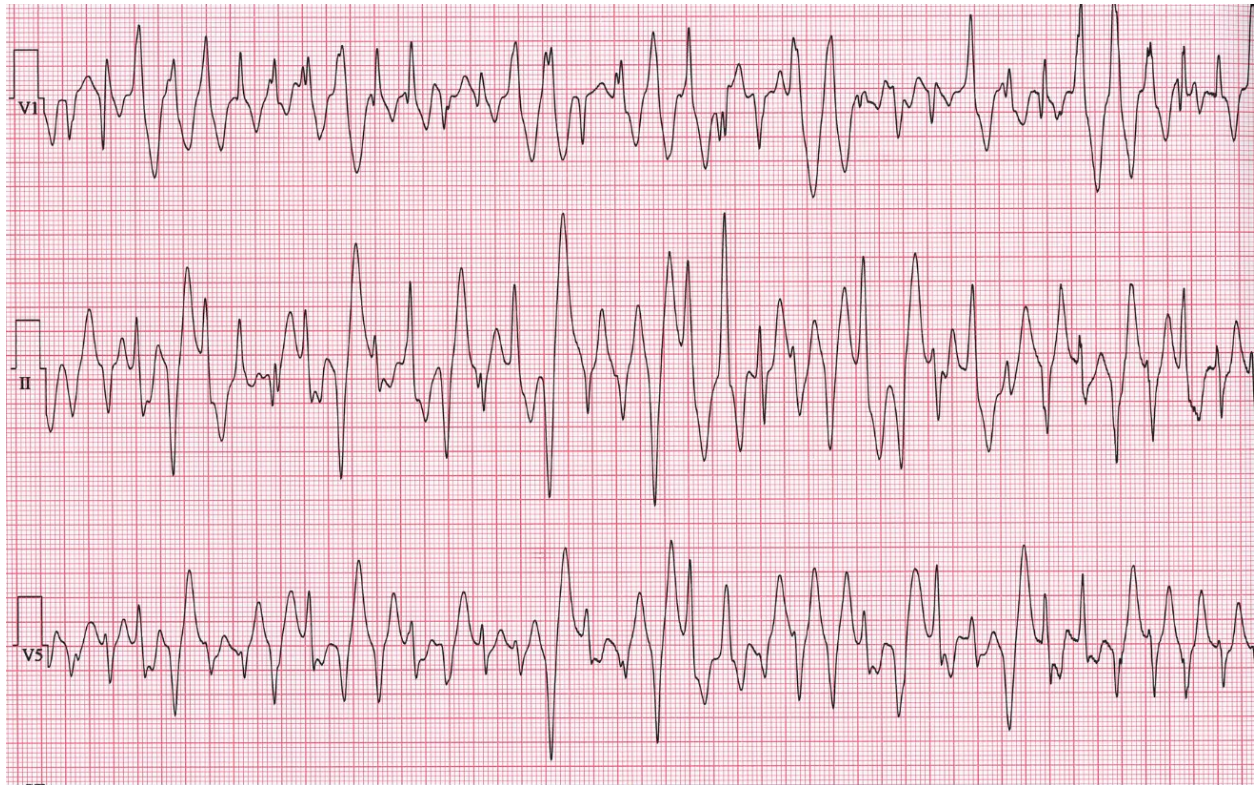

Supplement: Supplementary file 1 [file 28339223]
